# Supplementary material
Source: Springer Nature journal article supplement (https://www.springermedizin.de/resource/supplementary/12943_2010_684_MOESM5_ESM.pdf/9554574)

a

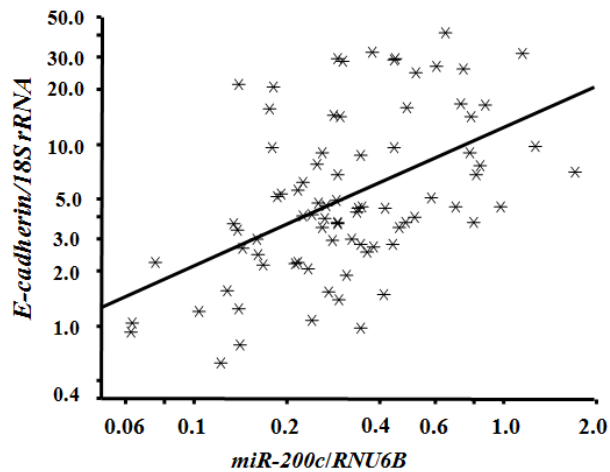

b

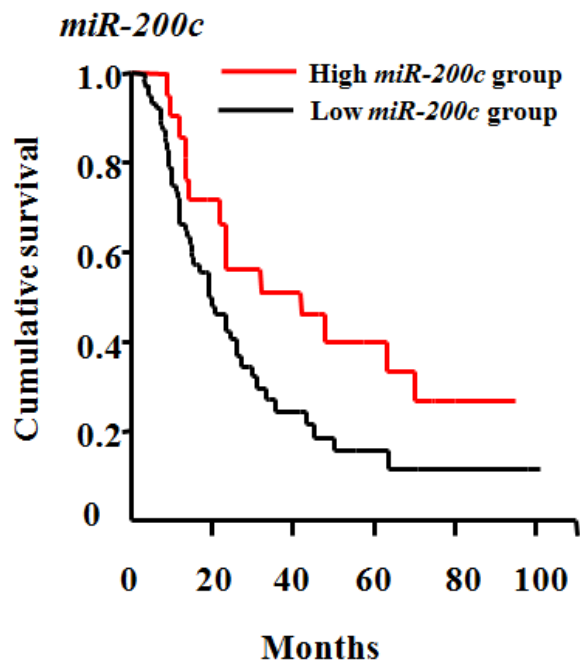

c

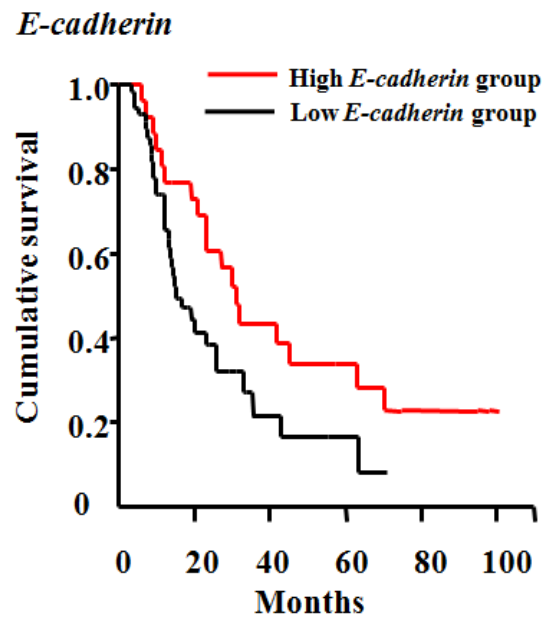

Supplement: MOESM5 [file 9554574]
